# Supplementary material
Source: PubMed Central journal article supplement (PMC2453714)
Supplement: 0802253105_0802253105SI.pdf [file 0802253105_0802253105SI.pdf]

# Supporting Information

Zheng *et al.* 10.1073/pnas.0802253105

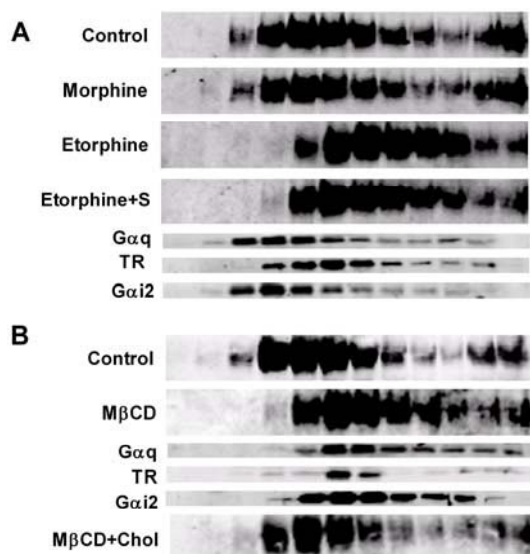

**Fig. S1.** Immunoblotting image of tMOR localization. (A) Sucrose gradient fractionation of the cell homogenates. Immunoblotting image for Fig. 1 A. HEK293 cells were treated with 1  $\mu$ M morphine, 10 nM etorphine, or 10 nM etorphine with 0.4 M sucrose pretreatment for 10 min (Etorphine+S). Then MOR location on the cell membrane was determined, as described in *Materials and Methods*. G $\alpha$ q represented the location of lipid raft domains, while transferin receptor (TR) showed nonraft domains. (B) Distribution of MOR after M $\beta$ CD and cholesterol treatment. Immunoblotting image for Fig. 2. HEK293 were treated with 1 mM M $\beta$ CD for 1 h (M $\beta$ CD) or 1 mM M $\beta$ CD for 1 h and then 10  $\mu$ g/ml cholesterol for 3 h (M $\beta$ CD+Chol). Immunoreactivities of G $\alpha$ i2, G $\alpha$ q, and TR were also detected.

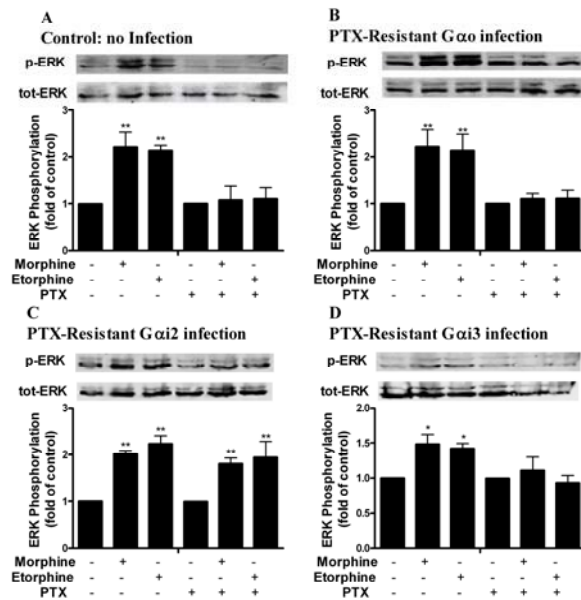

**Fig. S2.** MOR used  $G\alpha i2$  to mediate ERK1/2 phosphorylation. N2A cells with MOR-HA stably expressed were infected with different PTX-insensitive  $G\alpha$ , control (A),  $G\alpha o$  (B),  $G\alpha i2$  (C), and  $G\alpha i3$  (D). Before experiments, 100 ng/ml PTX was used to treat the cells overnight. Then the cells were exposed to 1  $\mu$ M morphine or 10 nM etorphine for 10 min. The bar graphs represent the averages of ERK1/2 phosphorylation increases from the basal level determined in experiments repeated at least three times. \*,  $P \leq 0.05$  and \*\*,  $P \leq 0.005$  in two-tail  $t$  test.

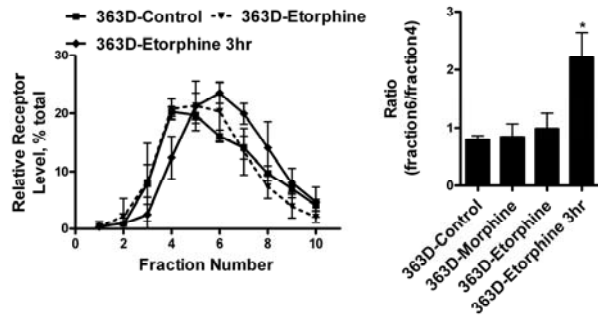

**Fig. S3.** MOR translocation in a mutant lacking GRK phosphorylation sites. HEK293 cells transfected with MOR363D were treated either with 1  $\mu$ M morphine (10 min) or with 10 nM etorphine (10 min or 3 h). The locations of MOR in the sucrose gradient fractions were then determined. All of the experiments were repeated at least three times. \*,  $P \leq 0.05$  and \*\*,  $P \leq 0.005$  in two-tail  $t$  test.
